# Supplementary material for: Effects of Zn Exposure on Populus simonii Seedling Growth and Its Resistance to Leaf Rust
Source: MDPI journal article supplement (doi:10.3390/f14040783), 2023-04-11
Supplement: s1 [file s1]

## Supplementary material

**Table S1.** Physical and chemical properties in soil.

| N content (mg/kg) | P content (mg/kg) | K content (mg/kg) | pH value | Electroconductibility (μS/cm) |
|-------------------|-------------------|-------------------|----------|-------------------------------|
| 16±1.55           | 21.5±1.97         | 55±4.65           | 6.5±0.39 | 216.33±28.95                  |

Note: Values presented in the table are means ± standard deviations (n = 3).

**Table S2.** The enrichment coefficient and transport coefficient of CK and Zn treatment groups.

|                   | Root enrichment coefficient | Stem enrichment coefficient | Leaf enrichment coefficient | Transfer coefficient |
|-------------------|-----------------------------|-----------------------------|-----------------------------|----------------------|
| CK                | 0.911 ± 0.011D              | 1.026 ± 0.020D              | 1.323 ± 0.008D              | 2.578 ± 0.009B       |
| Zn <sub>300</sub> | 2.095 ± 0.008A              | 1.346 ± 0.011B              | 2.427 ± 0.055A              | 1.801 ± 0.031C       |
| Zn <sub>500</sub> | 1.087 ± 0.018B              | 1.875 ± 0.016A              | 1.875 ± 0.016B              | 2.770 ± 0.051A       |
| Zn <sub>700</sub> | 1.032 ± 0.006C              | 1.232 ± 0.020C              | 1.672 ± 0.015C              | 2.811 ± 0.024A       |

The values shown in the table are the average value ± SD (n=3). Different letters indicate that there are significant differences among groups (one-way ANOVA,  $P < 0.05$ ).

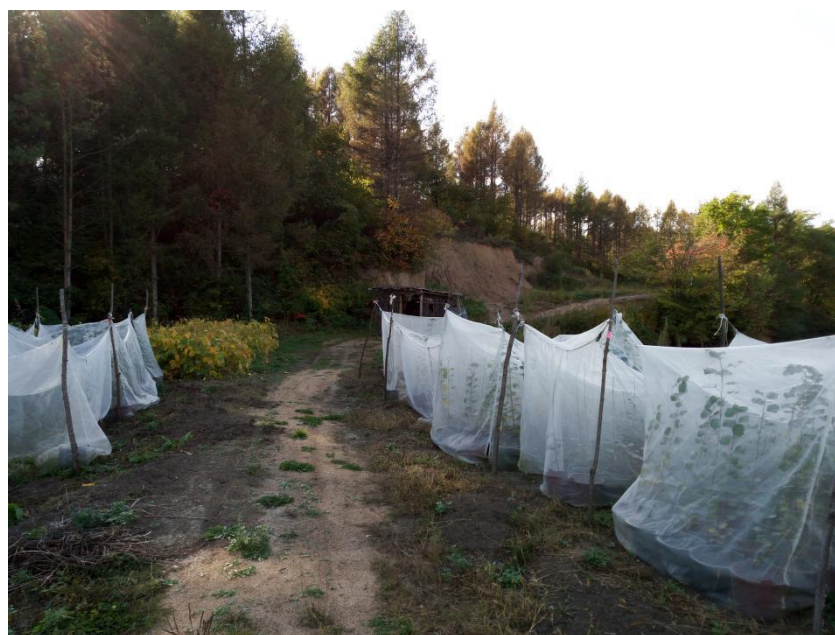

**Figure S1.** Diagram of seedling cultivation site.
